# Supplementary material
Source: Royal Society of Chemistry journal article supplement (doi:10.1039/d6dt01061j)
Supplement: d6dt01061j1.pdf [file d6dt01061j1.pdf]

## Supporting Information

### **Alkali-Site Lithium Doping Enables a High-Performance $\text{Na}_3\text{Fe}_2(\text{PO}_4)(\text{P}_2\text{O}_7)$ Cathode for Sodium-Ion Batteries**

Zijun Sun<sup>†</sup>, Wenzhu Cao<sup>†</sup>, Xiyang Hu, Ze Yang\*

*Institute of Nanoscience and Nanotechnology, School of Physical Science and Technology,*

*Central China Normal University, Wuhan 430079, China*

\* Corresponding authors. Email: [yz@ccnu.edu.cn](mailto:yz@ccnu.edu.cn) (Y.Z.)

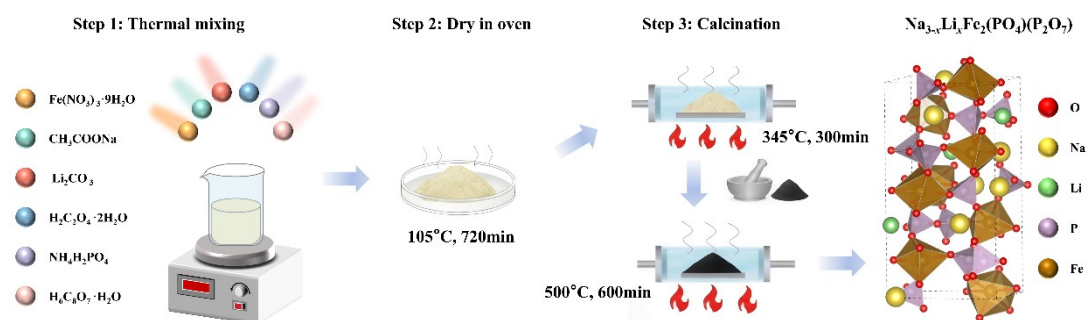

**Figure S1.** Schematic illustration of the synthesis process of the as-prepared samples.

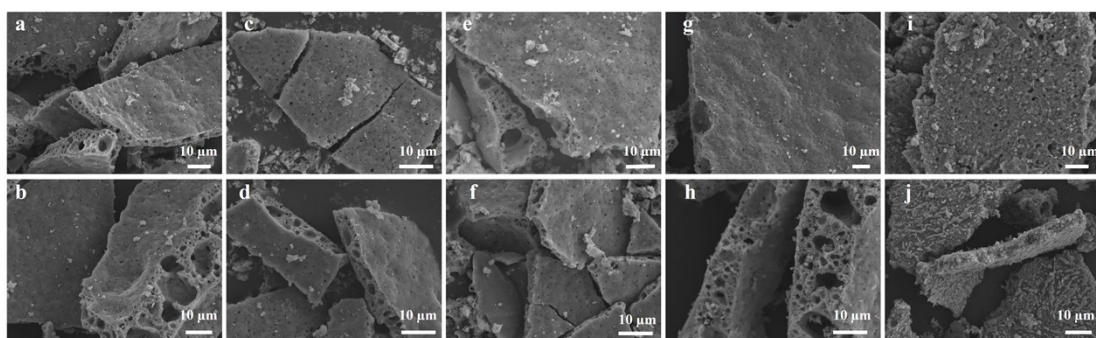

**Figure S2.** SEM images of  $\text{Na}_{3-x}\text{Li}_x\text{Fe}_2(\text{PO}_4)(\text{P}_2\text{O}_7)\text{@C}$  material. Among them, (a and b)  $\text{N3F2PP@C}$ , (c and d)  $\text{NLF2PP@C-0.01}$ , (e and f)  $\text{NLF2PP@C-0.05}$ , (g and h)  $\text{NLF2PP@C-0.1}$ , (i and j)  $\text{NLF2PP@C-0.2}$ .

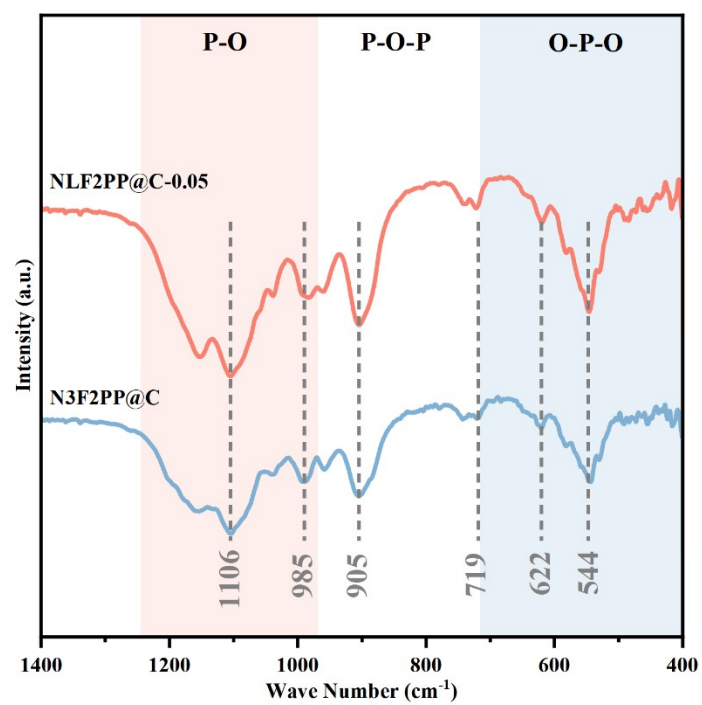

**Figure S3.** Fourier transform infrared (FT-IR) spectra of N3F2PP@C and NLF2PP@C-0.05.

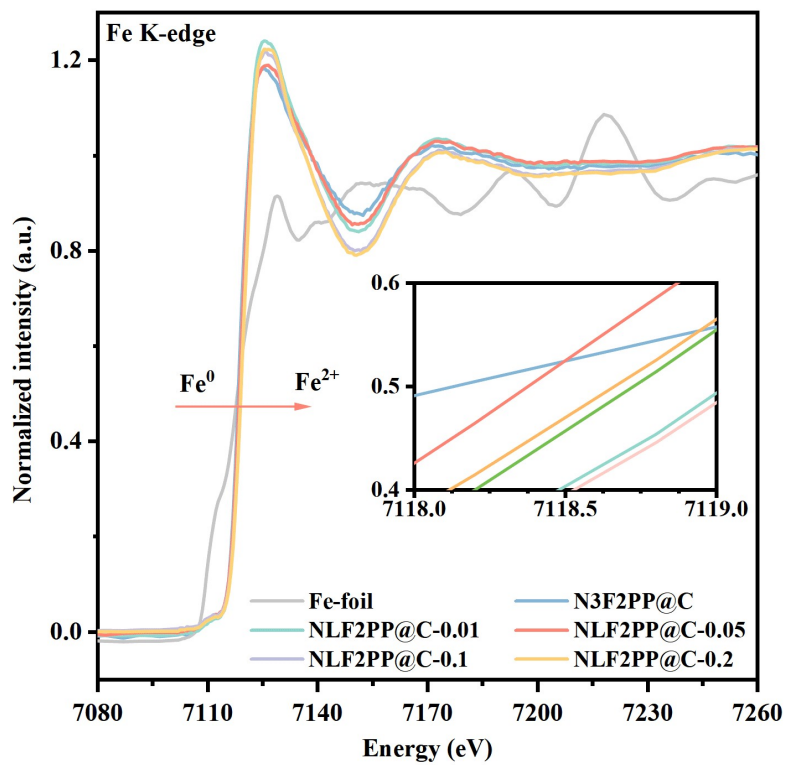

**Figure S4.** Fe K-edge XAS spectra of all cathodes.

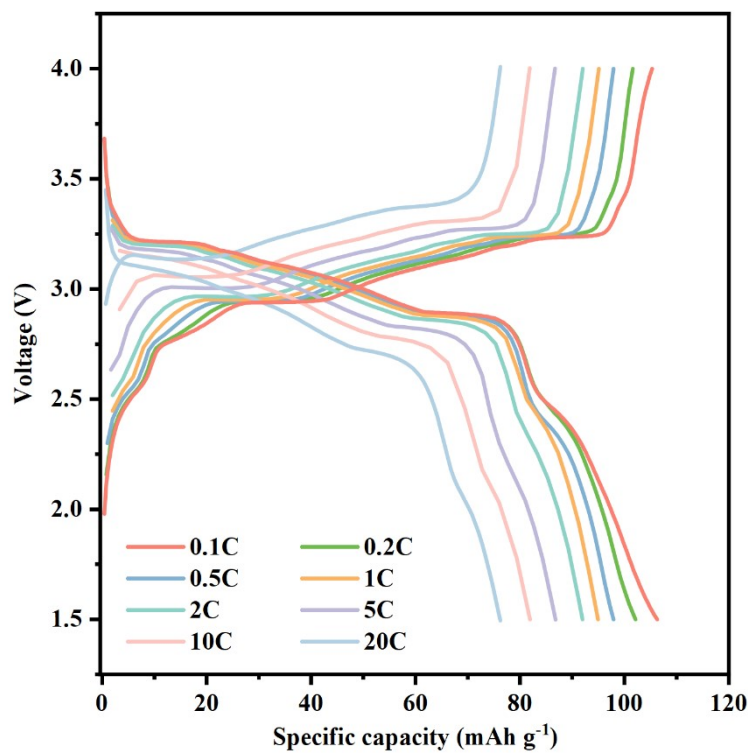

**Figure S5.** The GCD curves of N3F2PP@C at current rates from 0.1 to 20 C.

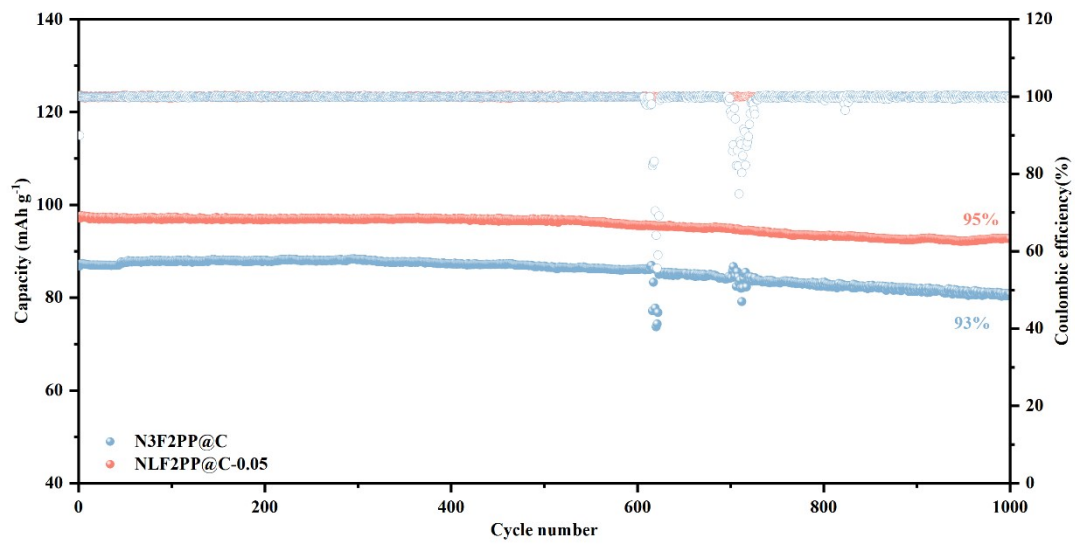

**Figure S6.** Long-term cycling performance of N3F2PP@C and NLF2PP@C-0.05 at 5 C.

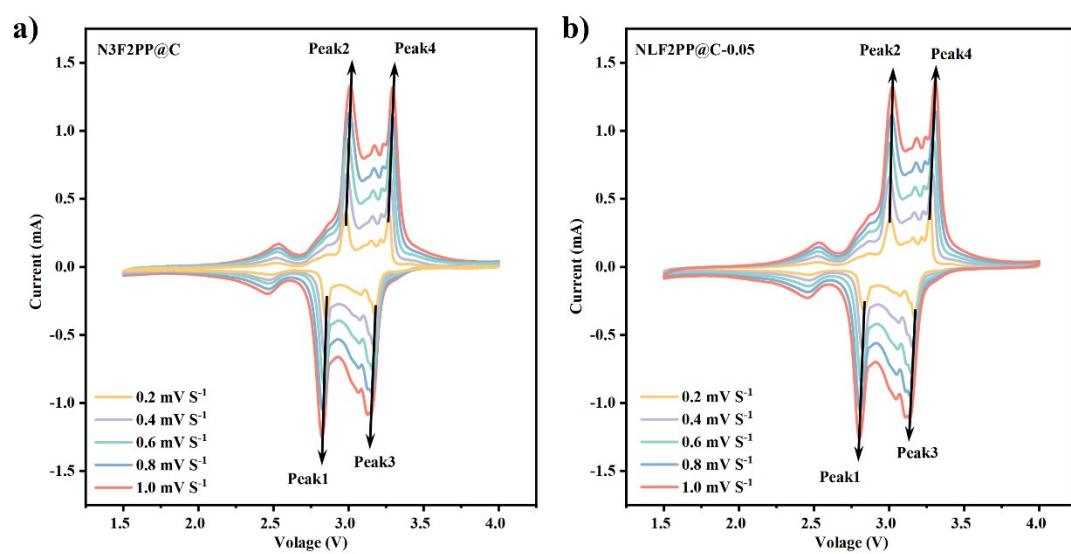

**Figure S7.** CV curves of (a) N3F2PP@C and (b) NLF2PP@-0.05 cathode at different sweep rates.

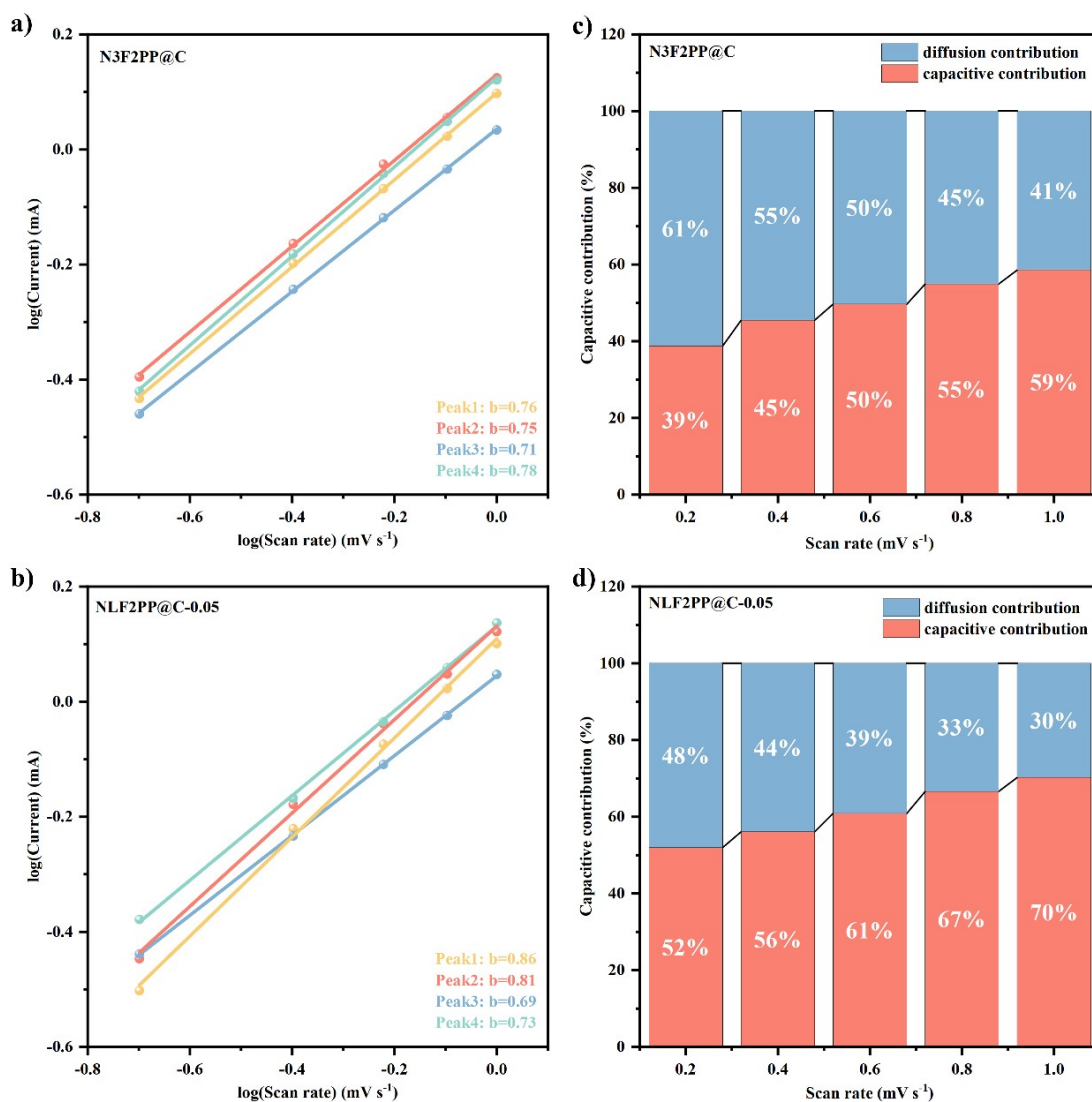

**Figure S8.** Electrochemical kinetics analysis of (a and c) N3F2PP@C and (b and d) NLF2PP@C-0.05. (a and b) The relationship between peak current ( $I_p$ ) and scan rate ( $v$ ). (c and d) Percentage of pseudo-capacitance control at different scan rates.

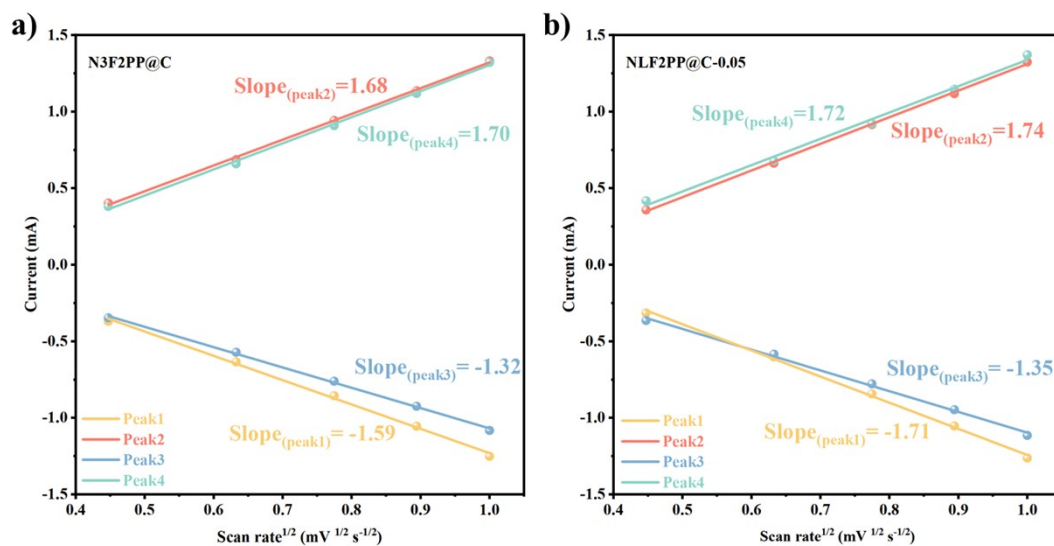

**Figure S9.** The relationship between the peak current ( $I_p$ ) of the (a) N3F2PP@C and (b) NLF2PP@C-0.05 cathode and the square root of the scan rate ( $v^{1/2}$ ).

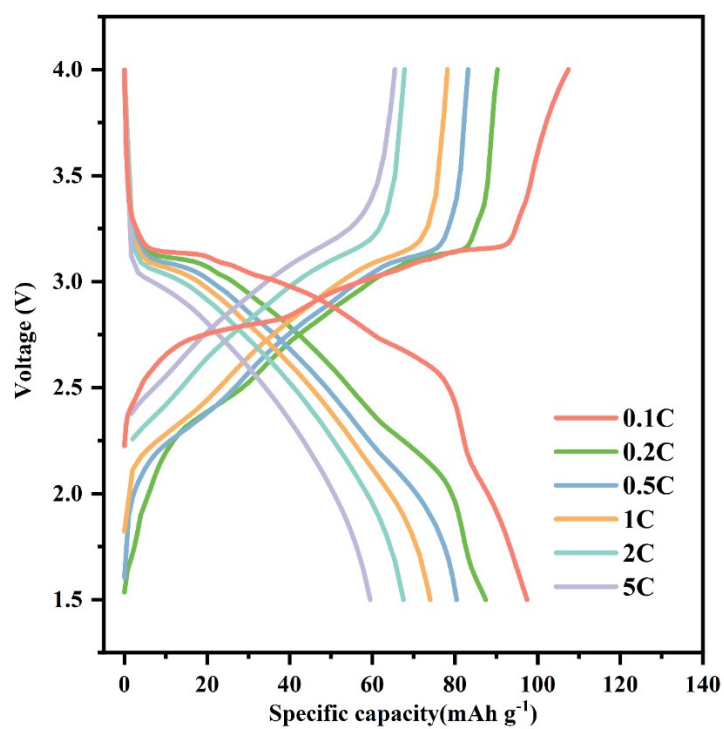

**Figure S10.** The GCD curves of N3F2PP@C||HC at current rates from 0.1 to 5 C.

Table S1. Specific discharge capacities and the corresponding capacity recovery rates of NLF2PP@C-*x* electrodes. The recovery rate is calculated by comparing the discharge capacity at 1 C after high-rate cycling (up to 20 C) with the initial capacity at 1 C.

| Sample        | Initial Capacity<br>(1 C, mAh/g) | Restored Capacity<br>(1 C, mAh/g) | Capacity Recovery<br>Rate (%) |
|---------------|----------------------------------|-----------------------------------|-------------------------------|
| N3F2PP@C      | 95.2                             | 95.5                              | 100.3%                        |
| NLF2PP@C-0.01 | 95.8                             | 96.7                              | 100.9%                        |
| NLF2PP@C-0.05 | 102.4                            | 103.5                             | 101.1%                        |
| NLF2PP@C-0.1  | 96.2                             | 97.3                              | 101.1%                        |
| NLF2PP@C-0.2  | 88.2                             | 88.2                              | 100.0%                        |
